# Supplementary material
Source: MDPI journal article supplement (https://www.mdpi.com/2079-9276/13/1/11)
Supplement: s1 [file s1 › resources-2742524-supplementary.pdf]

## Supplementary Material A

### **Survey Questionnaire for the Success Factors and Challenges in Implementing Constructed Wetlands Project in the City of Bayawan, Negros Oriental**

**Purpose of the survey:** This survey aims to elicit the awareness of the household heads on the presence of constructed wetlands (CWs) in the community, perception on the sustainability of CWs, as well as the opportunities and challenges for its replication in the Philippines and other countries.

**Target audience:** The target participants of the survey are the household heads of the community who benefit from the CWs as a nature-based solution to treat their domestic wastewater.

**Description of the Instrument:** The survey questionnaire is divided into three sections, each of which aims to collect a different type of information. Before proceeding with the study, a brief summary of the study is provided. The participants will be asked to provide their informed consent to participate in the study in the first section of the questionnaire to meet the standards of ethical considerations. The first section aims to collect information regarding the respondents' socioeconomic background. The second section ascertains the respondents' awareness of the presence of CWs in their community and the sustainability of the CWs. The third section elicits the problems and success factors that the respondents believe to have a significant impact on the implementation of the CWs project.

The online version of the survey questionnaire can be found at the following link: <https://forms.gle/78dg3kmK28EG4LWQA>

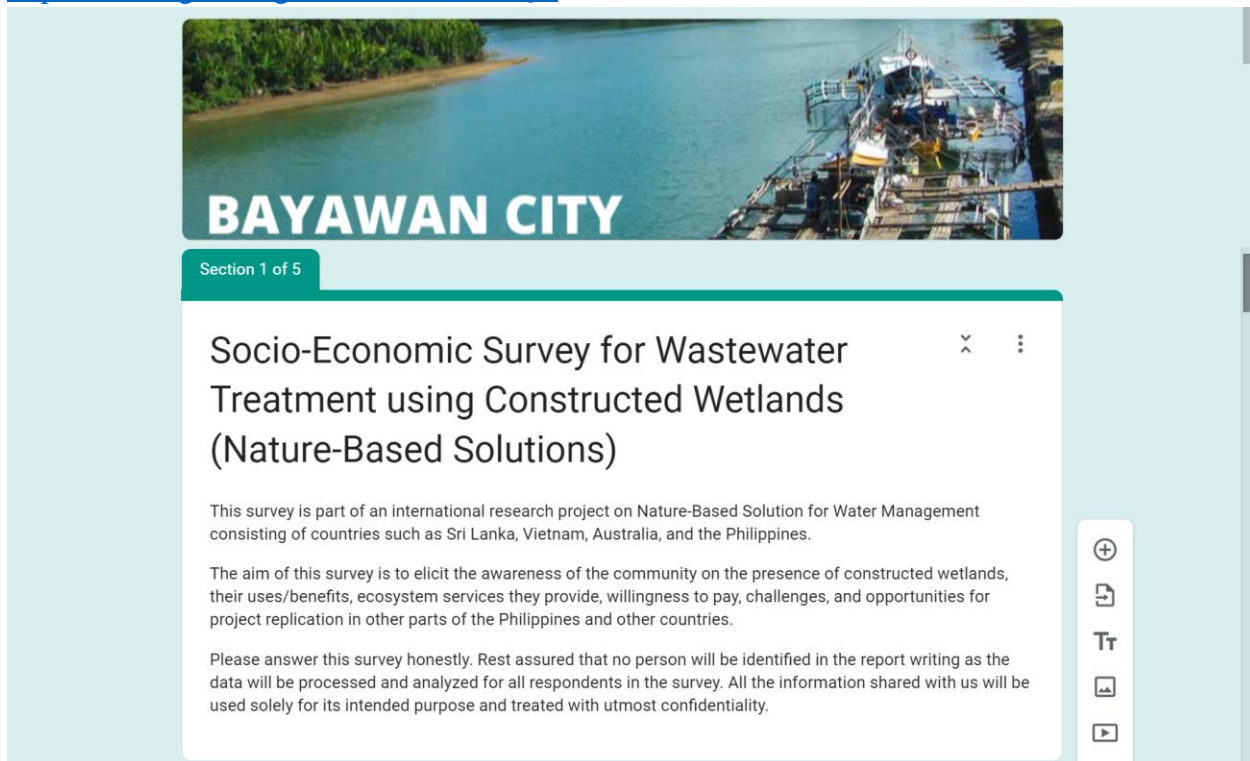

The screenshot displays a digital survey form. At the top, there is a header image showing a body of water with a constructed wetland structure, labeled "BAYAWAN CITY". Below this, a teal bar indicates "Section 1 of 5". The main title of the survey is "Socio-Economic Survey for Wastewater Treatment using Constructed Wetlands (Nature-Based Solutions)". The introductory text states: "This survey is part of an international research project on Nature-Based Solution for Water Management consisting of countries such as Sri Lanka, Vietnam, Australia, and the Philippines." The purpose of the survey is described as: "The aim of this survey is to elicit the awareness of the community on the presence of constructed wetlands, their uses/benefits, ecosystem services they provide, willingness to pay, challenges, and opportunities for project replication in other parts of the Philippines and other countries." A confidentiality statement follows: "Please answer this survey honestly. Rest assured that no person will be identified in the report writing as the data will be processed and analyzed for all respondents in the survey. All the information shared with us will be used solely for its intended purpose and treated with utmost confidentiality." On the right side of the form, there are icons for adding, deleting, translating, and other functions.

By proceeding to this survey, you agree and provide prior consent to use the information that will be collected and stored here for research undertaking of the researchers. Disclosure of personal data will not be done without notice and expressed consent of the respondents. \*

**B** *I* U 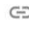 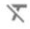

☐ Yes

☐ No

## Section 2 of 5

### Part 1. Socioeconomic Profile

Description (optional)

1. Name/Nickname:

**B** *I* U 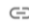 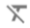

Short answer text

2. Age: \*

Short answer text

3. Sex: \*

Short answer text

4. Marital Status: \*

- ☐ Single
- ☐ Married
- ☐ Widowed
- ☐ Separated
- ☐ Common law (Domestic partnership/Live-in)

5. Highest Educational Attainment: \*

- ☐ Elementary Level
- ☐ High School Level
- ☐ High School Graduate
- ☐ College Graduate
- ☐ Vocational

8. Total monthly income of the household: \*

- ☐ Below 5,000
- ☐ Php 5,000 - 10,000

8. Total monthly income of the household: \*

- ☐ Below 5,000
- ☐ Php 5,000 - 10,000
- ☐ Php 10,001 - 20,000
- ☐ Above Php 20,000

9. Cluster Number (e.g., Cluster 1) \*

Short answer text

After section 2 Continue to next section

Section 3 of 5

Part 2. Awareness on Constructed Wetland

Description (optional)

2-1. Do you know what is a constructed wetland? \*

- ☐ Yes
- ☐ No

2-2. Are you aware on the existence of a constructed wetland to treat your wastewater in the Gawad Kalinga Village? \*

- ☐ Yes
- ☐ No

Section 4 of 5

**Part 5. Challenges in the Constructed Wetland**

Description (optional)

5-1. Did you encounter any problem in the constructed wetlands? (e.g., foul smell, flooding, not pleasing to the eye, etc.) If yes, please mention.

Short answer text

5-2. Do you think the project will be sustainable in the long run? If not, what factors might affect its operation? (e.g., typhoon, flooding, storm surge, sea level rise, earthquake, public acceptance, change in policy, change in rates, overcrowding of the community, improper maintenance, mismanagement, etc.)

Short answer text

5-3. Why do you think, the CW project was successfully implemented in GK village (e.g., Government support, public acceptance/support, proper information and communication with the residents, promised benefits, good governance, consistent monitoring and evaluation of the project, strong international partnership, etc.)?

Short answer text

After section 4 Continue to next section

Section 5 of 5

End of survey.

Thank you very much for your time.

## **Supplementary Material B**

### **Sample Questions for the Key Informant Interview (KII) on the Success Factors and Challenges in Implementing Constructed Wetlands Project in the City of Bayawan, Negros Oriental**

#### **Background of the Research Project**

This KII is part of an international research project on Nature-Based Solution for Water Management consisting of countries such as Sri Lanka, Vietnam, Australia, and the Philippines.

The aim of this KII is to explore the lived experience of various stakeholders in the implementation of the CWs project in the City of Bayawan, Negros Oriental.

Please answer the questions honestly. Rest assured that no person will be identified in the report writing as the data will be processed and analyzed for all respondents in this KII. All the information shared with us will be used solely for its intended purpose and treated with utmost confidentiality.

#### **Informed Consent**

By proceeding to this KII, you agree and provide prior consent to use the information that will be collected and stored here for research undertaking of the researchers. Disclosure of personal data will not be done without notice and expressed consent of the respondents. [Y/N]

#### **Background of the Participant**

1. What is your name and what office/ department are you working with?
2. What is your role in the implementation of the CWs project?
3. How long have/had you been working in the project?

#### **Guide Questions**

1. What are the main challenges in the implementation of the project [formulation/feasibility, planning, implementation, monitoring and evaluation]?
2. How did your office/department manage these challenges?
3. What are the factors that made this project successful and still operational after 15 years?
